# Supplementary material for: Using the Internet to Promote Health Behavior Change: A Systematic Review and Meta-analysis of the Impact of Theoretical Basis, Use of Behavior Change Techniques, and Mode of Delivery on Efficacy
Source: PubMed Central journal article supplement (PMC2836773; doi:10.2196/jmir.1376), 2010-02-17
Supplement: jmir_v12i1e4_app2.pdf [file jmir_v12i1e4_app2.pdf]

**Multimedia Appendix 2.** Intervention characteristics for interventions included in the meta-analysis

| Study                                    | Theoretical. basis | Use of theory         | Behavior change techniques      | Mode of delivery |
|------------------------------------------|--------------------|-----------------------|---------------------------------|------------------|
| An et al (2007) [96]                     | none reported      | none reported         | 26                              | c, g             |
| Bersamin et al (2007) [97] – drinkers    | TPB                | 1, 5, 9, 11           | 1, 4, 16, 19                    | a, b, f          |
| Bersamin et al (2007) [97] – nondrinkers | TPB                | 1, 5, 9, 11           | 1, 4, 16, 19                    | a, b, f          |
| Bosak et al (2007) [98]                  | SCT                | 1, 3, 5               | none reported                   | none reported    |
| Brendryen & Kraft (2008) [4]             | none reported      | none reported         | 26, 34                          | b, d, i          |
| Brendryen et al (2008) [5]               | SCT, SRT           | 1, 2, 5, 8, 11        | 7, 16, 26, 34, 35, 36           | b, c, g, h, i    |
| Buller et al (2008) [99]                 | DIM, SCT           | 1, 5, 9, 11           | 1, 3, 4, 5, 20                  | c                |
| Carr et al (2008) [21] - Study 1         | SCT, TTM           | 1, 5, 6, 8, 9, 10, 11 | 5, 7, 8, 13, 16, 27, 28, 34, 35 | e, h             |
| Carr et al (2008) [21] - Study 2         | SCT, TTM           | 1, 5, 6, 8, 9, 10, 11 | 5, 7, 8, 13, 16, 27, 28, 34, 35 | e, h             |
| Celio et al (2000) [100]                 | none reported      | 2, 5, 8, 10, 11       | 1, 16, 19, 27, 28               | d, f             |
| Chan et al (2007) [92]                   | none reported      | none reported         | none reported                   | a, b, d, e, h    |
| Chiauzzi et al (2005) [101]              | none reported      | none reported         | 1, 2, 4, 20, 27, 39             | d                |
| Christakis et al (2006) [102]            | none reported      | none reported         | 1, 20                           | none reported    |
| Christensen et al (2006) [103]           | none reported      | none reported         | 8, 17, 36                       | e, h             |

|                                      |                    |                    |                             |               |
|--------------------------------------|--------------------|--------------------|-----------------------------|---------------|
| Cintron et al (2006) [104]           | none reported      | none reported      | 1, 20                       | c, g          |
| Cook et al (2007) [105]              | SCT, TTM           | 1, 5, 8, 11        | 1, 2, 8, 12, 16, 20, 28, 37 | a             |
| Cussler et al (2008) [106]           | none reported      | none reported      | 1, 6, 16, 17, 19            | a, d, f       |
| Etter (2005) [107]                   | TPB, TTM           | 1, 5, 6, 8, 11     | 1                           | none reported |
| Fordis et al (2005) [108]            | none reported      | 2, 5               | 1, 19, 21, 23               | a, d          |
| Frosch et al (2003) [73]             | Same as comparison | Same as comparison | Same as comparison          | none reported |
| Glasgow et al (2003) [93]            | none reported      | 2, 5, 8, 10, 11    | 5, 8, 16, 17, 19, 20        | a, d, e       |
| Gold et al (2007) [81]               | none reported      | none reported      | 17, 19, 20                  | d, e          |
| Gollings & Paxton (2006) [109]       | none reported      | none reported      | Same as comparison          | e, f          |
| Hager et al (2001) [110]             | TTM                | 1, 3, 5, 6         | none reported               | none reported |
| Hänggi (2004) [86]                   | none reported      | none reported      | 17, 35, 39                  | d, f          |
| Heinicke et al (2007) [111]          | none reported      | 2, 4, 5, 8, 10, 11 | 2, 16, 34, 36               | d, f          |
| Huang et al (2006) [79]              | none reported      | none reported      | 20                          | b             |
| Hurling, Catt et al (2007) [71]      | ELM, TPB           | 1, 5               | 4, 5, 7, 8, 19              | g, i          |
| Hurling, Fairley, & Dias (2006) [37] | ELM, SCT, TPB, TTM | 1, 2, 5            | 4, 8, 22                    | c, i          |
| Jacobi et al (2007) [112]            | none reported      | none reported      | none reported               | none reported |

|                                   |                    |                     |                                |               |
|-----------------------------------|--------------------|---------------------|--------------------------------|---------------|
| Jago et al (2006) [113] - Wave 1  | none reported      | none reported       | 1, 3, 5, 8, 10, 13, 14, 19, 20 | a, b, d       |
| Jago et al (2006) [113] - Wave 2  | none reported      | none reported       | 1, 3, 5, 8, 10, 13, 14, 19, 20 | a, b, d       |
| Japuntich et al (2006) [114]      | none reported      | none reported       | 1, 5, 8, 17, 20, 34, 36        | a, c, d, f, h |
| Jones et al (2008) [84]           | none reported      | none reported       | 5, 8, 16, 20, 28, 34, 36       | c, d, f,      |
| Kim & Kang (2006) [72]            | TTM                | 1, 3, 5, 6          | 1, 5, 7, 16, 20                | a, d, e, h    |
| Kosma et al (2005) [115]          | TTM                | 1, 2, 3, 4, 5, 8, 9 | 5, 8, 13, 16, 22, 23, 28       | c, g          |
| Kypri & McAnally (2005) [116]     | none reported      | none reported       | 4, 16, 19                      | b             |
| Lin et al (2005) [117]            | none reported      | none reported       | none reported                  | d             |
| Lorig et al (2006) [118]          | none reported      | 2, 5                | 7, 20, 28, 32, 36              | e, f, g       |
| Marks et al (2006) [34]           | Same as comparison | Same as comparison  | Same as comparison             | a             |
| Marshall et al (2003) [119]       | Same as comparison | Same as comparison  | Same as comparison             | a, g          |
| McKay, Danaher et al (2008) [85]  | none reported      | 1, 3                | 1, 5, 7, 8, 22, 36             | a, d, f, g    |
| McKay, King et al (2001) [120]    | none reported      | none reported       | 2, 5, 7, 8, 12, 16, 19, 20     | d, f          |
| Meigs et al (2003) [121]          | none reported      | none reported       | none reported                  | b             |
| Mevissen et al (Forthcoming) [90] | none reported      | none reported       | 1, 2, 4, 5, 8, 21              | a             |
| Mikolajczak et al (2008) [70]     | SCT                | 1, 2, 3, 5, 7, 10   | 1, 3, 21                       | a             |

|                                    |                    |                    |                                |               |
|------------------------------------|--------------------|--------------------|--------------------------------|---------------|
| Moore et al (2005) [35]            | Same as comparison | Same as comparison | Same as comparison             | none reported |
| Munoz et al (2006) [32] - Study 3  | none reported      | none reported      | 16, 17, 20, 36                 | none reported |
| Munoz et al (2006) [32] - Study 4  | none reported      | none reported      | 16, 17, 20, 36                 | none reported |
| Napolitano et al (2003) [122]      | SCT                | 1, 3, 5, 6         | 1, 5, 7, 8, 13, 16, 17, 28, 34 | c, g          |
| Nguyen et al (2008) [123]          | Same as comparison | Same as comparison | Same as comparison             | none reported |
| Oenema et al (2008) [124]          | PAPM               | 1, 2, 5, 6, 8, 11  | 2, 4, 5, 7, 16, 19, 20         | b             |
| Paschall et al (2006) [125]        | none reported      | none reported      | 2, 4, 16, 20                   | a, c, f, g    |
| Patten et al (2006) [31]           | SCT                | 1, 5, 8, 11        | 1, 3, 8, 28, 34, 36            | a, d, f       |
| Pike et al (2007) [126]            | none reported      | none reported      | none reported                  | none reported |
| Prestwich (2003) [127] – approach  | none reported      | 5                  | 7                              | none reported |
| Prestwich (2003) [127] – avoidance | none reported      | 5                  | 7                              | none reported |
| Prochaska et al (2008) [128]       | TTM                | 1, 2, 3, 4, 5, 6   | 1, 4, 16, 19                   | b             |
| Riper et al (2008) [129]           | none reported      | 2, 5, 8, 10        | 5, 34                          | f             |
| Ritterband et al (2003) [130]      | none reported      | none reported      | 7, 20, 21, 34                  | a             |
| Roberto et al (2007) [131]         | EPPM, TPB          | 1, 2, 5, 8, 11     | 1, 2, 20                       | a, j          |
| Rodriguez et al (2006) [74]        | none reported      | none reported      | Same as comparison             | none reported |

|                                       |                    |                    |                                 |               |
|---------------------------------------|--------------------|--------------------|---------------------------------|---------------|
| Ross et al (2004) [132]               | none reported      | none reported      | 16, 17                          | d             |
| Saitz et al (2007) [133]              | none reported      | none reported      | 1, 2, 4, 17, 31                 | b             |
| Shimazu et al (2005) [134]            | SCT                | 1, 3, 5, 8, 11     | 1, 8, 26, 34                    | a, c          |
| Skår et al (In press) [6]             | none reported      | 1, 5               | 7                               | none reported |
| Sniehotta et al [7]                   | none reported      | 1, 5               | 7                               | none reported |
| Spittaels et al (2007) [135]          | TPB, TTM           | 1, 5, 6, 8, 11     | 2, 4, 7, 8, 20, 28              | c, g          |
| Spittaels et al (2007) [19]           | TPB, TTM           | 1, 3, 5, 6, 8, 11  | 2, 5, 8, 20, 28                 | a, b, f, g    |
| Steele et al (2007) [136]             | Same as comparison | Same as comparison | Same as comparison              | c, g          |
| Strecher, Shiffman et al (2005) [137] | none reported      | none reported      | 4, 26, 28                       | c, g          |
| Strecher, McClure et al (2008) [138]  | HBM, SCT, TTM      | 1, 2, 5, 6, 8, 10  | none reported                   | none reported |
| Swartz et al (2006) [139]             | none reported      | none reported      | 1, 5, 7, 8, 20, 28              | a             |
| Thombs et al (2007) [140]             | SNT                | 1, 2, 3, 5, 8, 10  | 1, 4, 16                        | a, d          |
| Tomnay et al (2006) [141]             | none reported      | none reported      | 1                               | none reported |
| van den Berg et al (2006) [142]       | none reported      | none reported      | 5, 16, 20                       | e, f, g       |
| Vinokur et al (2006) [143]            | TPB                | 1, 2, 3, 5, 8, 11  | 1, 28                           | a             |
| Wade et al (2006) [91]                | none reported      | none reported      | 5, 6, 8, 21, 25, 28, 35, 36, 39 | a, d, k       |

|                                      |               |               |                      |               |
|--------------------------------------|---------------|---------------|----------------------|---------------|
| Walters et al (2007) [144]           | none reported | 2, 5, 7, 10   | 2, 4, 16, 19         | b             |
| White et al (2004) [145]             | none reported | 2             | 5, 8, 16, 19, 24, 34 | a, b, e, f, g |
| Williamson et al (2006) [49] – child | none reported | none reported | 5, 8, 16, 17, 19     | a, b, e, g    |
| Williamson et al (2006) [49] – adult | none reported | none reported | 5, 8, 16, 17, 19     | a, b, e, g    |
| Winett et al (2007) [146]            | none reported | none reported | 5, 7, 12, 13, 19     | a             |
| Zabinski et al (2001) [147]          | none reported | none reported | none reported        | f             |
| Zabinski et al (2004) [148]          | none reported | none reported | 1, 8, 25, 34         | d, f, g       |

---

*Note.* ‘Use of theory’ includes the use of predictors - constructs that are not explicitly linked to a theory by the authors, but that are targeted for intervention because they predict behavior [14].
