# Supplementary material for: Using the Internet to Promote Health Behavior Change: A Systematic Review and Meta-analysis of the Impact of Theoretical Basis, Use of Behavior Change Techniques, and Mode of Delivery on Efficacy
Source: J Med Internet Res. 2010 Feb 17;12(1):e4. doi: 10.2196/jmir.1376 (PMC2836773; doi:10.2196/jmir.1376)
Supplement: Supplementary file 1 [file jmir_v12i1e4_app1.pdf]

**Multimedia Appendix 1.** Effect sizes for interventions included in the meta-analysis

| Authors                                                                    | Behavior                         | $N_E$ | $N_C$ | Effect size $g$    |
|----------------------------------------------------------------------------|----------------------------------|-------|-------|--------------------|
| An, Hennrikus, Perry, Lein, Klatt, Farley et al (2007) [96]                | Recruitment to interventions     | 734   | 1490  | -0.20 <sup>c</sup> |
| Bersamin, Paschall et al (2007) [97] - baseline drinkers                   | Alcohol consumption              | 60    | 79    | 0.50 <sup>b</sup>  |
| Bersamin, Paschall et al (2007) [97] - baseline nondrinkers                | Alcohol consumption              | 118   | 113   | -0.01              |
| Bosak, Yates, & Pozehl (2007) [98]                                         | Physical activity                | 12    | 9     | 0.82               |
| Brendryen & Kraft (2008) [4]                                               | Smoking abstinence               | 197   | 199   | 0.35 <sup>b</sup>  |
| Brendryen, Drozd, & Kraft (2008) [5]                                       | Smoking abstinence               | 144   | 146   | 0.28               |
| Buller, Woodall, Zimmerman, Slater, Heimendinger et al (2008) [99]         | Dietary behavior                 | 242   | 231   | 0.15 <sup>a</sup>  |
| Carr, Barte, Dorozynski, Broomfield et al (2008) [21] - Study 1            | Physical activity                | 4     | 5     | 1.49 <sup>a</sup>  |
| Carr, Barte, Dorozynski, Broomfield et al (2008) [21] - Study 2            | Physical activity                | 14    | 18    | 0.13               |
| Celio, Winzelberg, Wilfley, Eppstein-Herald, Springer et al (2000) [100]   | Dietary behavior                 | 24    | 19    | 0.31               |
| Chan, Callahan, Hatch-Pigott, Lawless, Proffitt, Manning et al (2007) [92] | Symptom diary submission         | 60    | 60    | 0.29               |
| Chiauzzi, Green, Lord, Thum, & Goldstein (2005) [101]                      | Alcohol consumption              | 105   | 110   | 0.26               |
| Christakis, Zimmerman, Rivara, & Ebel (2006) [102]                         | Use of preventive care practices | 200   | 177   | 0.19 <sup>c</sup>  |
| Christensen, Liana, Barney, Mackinnon, & Griffiths (2006) [103]            | Help-seeking for depression      | 102   | 130   | 0.09               |
| Cintron, Phillips, & Hamel (2006) [104]                                    | Completion of document           | 430   | 482   | -0.05              |
| Cook, Billings, Hersch, Back, & Hendrickson (2007) [105]                   | Physical activity                | 209   | 210   | 0.08               |

|                                                                         |                                |      |      |                    |
|-------------------------------------------------------------------------|--------------------------------|------|------|--------------------|
|                                                                         | Dietary behavior               |      |      | 0.11               |
| Cussler, Teixeira, Going, Houtkooper, Metcalfe, Blew et al (2008) [106] | Physical activity              | 66   | 69   | -0.02              |
|                                                                         | Dietary behavior               |      |      | 0.12               |
| Etter (2005) [107]                                                      | Smoking abstinence             | 1896 | 2341 | -0.08 <sup>a</sup> |
| Fordis, King, Ballantyne, Jones, Schneider, Spann et al (2005) [108]    | Physician performance          | 17   | 18   | 0.54 <sup>a</sup>  |
| Frosch, Kaplan, & Felitti (2003) [73]                                   | Service uptake                 | 94   | 106  | -0.52 <sup>a</sup> |
| Glasgow, Boles, McKay, Feil, & Barrera (2003) [93]                      | Dietary behavior               | 37   | 33   | 0.03               |
| Gold, Burke, Buzzell, Pintauro, & Harvey-Berino (2007) [80]             | Dietary behavior               | 40   | 48   | 0.61 <sup>b</sup>  |
| Gollings & Paxton (2006) [109]                                          | Dietary behavior               | 20   | 19   | 0.12               |
| Hager, Hardy, & Aldana (2001) [110]                                     | Physical activity              | 201  | 201  | 0.09               |
| Hänggi (2004) [85]                                                      | Behavioral responses to stress | 41   | 40   | 0.62 <sup>c</sup>  |
| Heinicke, Paxton, McLean, & Wertheim (2007) [111]                       | Dietary behavior               | 28   | 34   | 0.52 <sup>c</sup>  |
| Huang, Barzi, Huxley, Denyer, Rohrlach, Jayne, & Neal (2006) [79]       | Food purchase                  | 246  | 251  | 0.55 <sup>c</sup>  |
| Hurling, Catt, Boni, Fairley, Hurst, Murray et al (2007) [71]           | Physical activity              | 47   | 30   | 2.25 <sup>c</sup>  |
| Hurling, Fairley, & Dias (2006) [37]                                    | Physical activity              | 23   | 20   | 0.53               |
| Jacobi, Morris, Beckers, Bronisch-Holtze, Winter et al (2007) [112]     | Dietary behavior               | 47   | 50   | 0.31 <sup>a</sup>  |
| Jago, Baranowski, Baranowski, Thompson et al (2006) [113] - Wave 1      | Physical activity              | 40   | 40   | 0.06               |
| Jago, Baranowski, Baranowski, Thompson et al (2006) [113] - Wave 2      | Physical activity              | 108  | 108  | 0.24 <sup>b</sup>  |

|                                                                      |                                |      |      |                    |
|----------------------------------------------------------------------|--------------------------------|------|------|--------------------|
| Japuntich, Zelmer, Smith, Jorenby, Valdez, Fiore et al (2006) [114]  | Smoking abstinence             | 140  | 144  | 0.15               |
| Jones, Luce, Osborne, Taylor, Cuning, Doyle et al (2008) [84]        | Dietary behavior               | 44   | 43   | -0.08              |
| Kim & Kang (2006) [72]                                               | Physical activity              | 28   | 23   | 1.27 <sup>c</sup>  |
| Kosma, Cardinal, & McCubbin (2005) [115]                             | Physical activity              | 46   | 29   | 0.36               |
| Kypri & McAnally (2005) [116]                                        | Physical activity              | 61   | 61   | 0.71 <sup>a</sup>  |
|                                                                      | Dietary behavior               |      |      | 0.65 <sup>a</sup>  |
|                                                                      | Alcohol consumption            |      |      | -0.11              |
| Lin, Wittevrongel, Moore, Beaty, & Ross (2005) [117]                 | Patient-provider communication | 175  | 166  | 0.72 <sup>c</sup>  |
| Lorig, Ritter, Laurent, & Plant (2006) [118]                         | Physical activity              | 354  | 426  | 0.13 <sup>a</sup>  |
|                                                                      | Behavioral responses to stress |      |      | 0.09 <sup>a</sup>  |
|                                                                      | Patient-provider communication |      |      | 0.05               |
| Marks, Campbell, Ward, Ribisl, Wildemuth, & Symons (2006) [34]       | Physical activity              | 158  | 161  | -0.43 <sup>b</sup> |
| Marshall, Leslie, Bauman, Marcus, & Owen (2003) [119]                | Physical activity              | 250  | 262  | -0.03              |
| McKay, Danaher, Seeley, Lichtenstein, & Gau (2008) [85]              | Smoking abstinence             | 1159 | 1159 | -0.04              |
| McKay, King, Eakin, Seeley, & Glasgow (2001) [120]                   | Physical activity              | 35   | 33   | -0.14              |
| Meigs, Cagliero, Dubey, Murphy-Sheehy, Gildesgame et al (2003) [121] | Service uptake                 | 307  | 291  | 0.01               |
| Mevissen, Ruiter, Meertens, Zimbile, & Schaalma (Forthcoming) [90]   | Sexual behaviors               | 33   | 37   | 0.12               |
| Mikolajczak, Van Breukelen, Kok, & Hospers (2008) [70]               | Service uptake                 | 242  | 287  | -0.23              |

|                                                                         |                                |      |      |                    |
|-------------------------------------------------------------------------|--------------------------------|------|------|--------------------|
| Moore, Soderquist, & Werch (2005) [35]                                  | Alcohol consumption            | 53   | 47   | 0.13               |
| Munoz, Lenert, Delucchi, Stoddard, Perez et al (2006) [32] - Study 3    | Smoking abstinence             | 141  | 139  | -0.43 <sup>a</sup> |
| Munoz, Lenert, Delucchi, Stoddard, Perez et al (2006) [32] - Study 4    | Smoking abstinence             | 142  | 146  | -0.07              |
| Napolitano, Fotheringham, Tate, Sciamanna, Leslie et al (2003) [122]    | Physical activity              | 21   | 31   | 0.37               |
| Nguyen, Donesky-Cuenco, Wolpin, Reinke, Benditt et al (2008) [123]      | Physical activity              | 19   | 20   | -0.15              |
| Oenema, Brug, Dijkstra, de Weerd, & de Vries (2008) [124]               | Physical activity              | 887  | 930  | -0.01              |
|                                                                         | Dietary behavior               |      |      | 0.16 <sup>b</sup>  |
|                                                                         | Smoking abstinence             |      |      | 0.18               |
| Paschall, Bersamin, Fearnow-Kenney, Wyrick, & Currey (2006) [125]       | Alcohol consumption            | 173  | 197  | 0.16 <sup>b</sup>  |
| Patten, Croghan, Meis, Decker, Pingree, Colligan et al (2006) [31]      | Smoking abstinence             | 70   | 69   | -0.47              |
| Pike, Rabius, McAlister, & Geiger (2007) [126]                          | Smoking abstinence             | 5404 | 1047 | 0.01               |
| Prestwich (2003) [127] - approach behaviors                             | Health behaviors               | 467  | 240  | -0.01              |
| Prestwich (2003) [127] - avoidance behaviors                            | Health behaviors               | 120  | 53   | 0.00               |
| Prochaska, Butterworth, Redding, Burden, Perrin, Leo et al (2008) [128] | Physical activity              | 503  | 464  | 0.23 <sup>b</sup>  |
|                                                                         | Behavioral responses to stress |      |      | 0.31 <sup>c</sup>  |
|                                                                         | Smoking abstinence             |      |      | 0.16               |
| Riper, Kramer, Smit, Conijn, Schippers, & Cuijpers (2008) [129]         | Alcohol consumption            | 130  | 131  | 0.58 <sup>c</sup>  |
| Ritterband, Cox, Walker, Kovatchev, McKnight, Patel et al (2003) [130]  | Pediatric encopresis           | 12   | 12   | 0.80 <sup>c</sup>  |

|                                                                     |                                |      |      |                    |
|---------------------------------------------------------------------|--------------------------------|------|------|--------------------|
| Roberto, Zimmerman, Carlyle, & Abner (2007) [131]                   | Sexual behaviors               | 125  | 183  | 0.51 <sup>a</sup>  |
| Rodriguez, von Glahn, Rogers, Chang, Fanjiang, & Safran (2006) [74] | Survey response rate           | 1477 | 2362 | -0.84 <sup>c</sup> |
| Ross, Moore, Earnest, Wittevrongel, & Lin (2004) [132]              | Medication / general adherence | 38   | 43   | 0.46 <sup>a</sup>  |
| Saitz, Palfai, Freedner, Winter, MacDonald, Lu et al (2007) [133]   | Alcohol consumption            | 126  | 109  | -0.09              |
| Shimazu, Kawakami, Irimajiri, Sakamoto, & Amano (2005) [134]        | Stress-related problem solving | 100  | 104  | 0.13               |
| Skår, Sniehotta, Molloy et al (in press) [6]                        | Physical activity              | 335  | 315  | 0.10               |
| Sniehotta, Araújo-Soares, & Dombrowski (2007) [7]                   | Dental flossing                | 64   | 70   | 0.32               |
| Spittaels, De Bourdeaudhuij, & Vandelanotte (2007) [135]            | Physical activity              | 103  | 104  | 0.32 <sup>c</sup>  |
| Spittaels, De Bourdeaudhuij, Brug, & Vandelanotte (2007) [19]       | Physical activity              | 116  | 141  | 0.07               |
| Steele, Mummery, & Dwyer (2007) [136]                               | Physical activity              | 48   | 49   | -0.30              |
| Strecher, Shiffman, & West (2005) [137]                             | Smoking abstinence             | 1759 | 1742 | 0.16 <sup>b</sup>  |
| Strecher, McClure, Alexander, Chakraborty, Nair et al (2008) [138]  | Smoking abstinence             | 488  | 456  | 0.20 <sup>a</sup>  |
| Swartz, Noell, Schroeder, & Ary (2006) [139]                        | Smoking abstinence             | 171  | 180  | 0.54 <sup>a</sup>  |
| Thombs, Olds, Osborn, Casseday, Glavin, & Berkowitz (2007) [140]    | Alcohol consumption            | 192  | 192  | -0.02              |
| Tomnay, Pitts, Kuo, & Fairley (2006) [141]                          | Contact tracing for STD        | 68   | 29   | -0.18              |
| van den Berg, Ronday, Peeters, le Cessie et al (2006) [142]         | Physical activity              | 77   | 75   | 0.59 <sup>c</sup>  |
| Vinokur, Merion, Couper, Jones, & Dong (2006) [143]                 | Service uptake                 | 331  | 159  | 0.22               |
| Wade, Carey, & Wolfe (2006) [91]                                    | Child behavior problems        | 19   | 20   | 0.61 <sup>c</sup>  |

|                                                                  |                     |     |     |                    |
|------------------------------------------------------------------|---------------------|-----|-----|--------------------|
| Walters, Vader, & Harris (2007) [144]                            | Alcohol consumption | 41  | 41  | -0.22              |
| White, Martin, Newton, Walden, York-Crowe et al (2004) [145]     | Physical activity   | 23  | 27  | 0.32               |
|                                                                  | Dietary behavior    |     |     | 0.18               |
| Williamson, Walden, White et al (2006) [49] – child sample       | Physical activity   | 23  | 28  | 0.36               |
|                                                                  | Dietary behavior    |     |     | 0.00               |
| Williamson, Walden, White et al (2006) [49] – adult sample       | Physical activity   | 26  | 26  | 0.11               |
|                                                                  | Dietary behavior    |     |     | -0.12              |
| Winett, Anderson, Wojcik, Winett, & Bowden (2007) [146]          | Physical activity   | 310 | 291 | 0.16               |
|                                                                  | Dietary behavior    |     |     | 0.14 <sup>b</sup>  |
| Zabinski, Pung, Wilfley, Eppstein, Winzelberg et al (2001) [147] | Dietary behavior    | 27  | 29  | -0.43 <sup>a</sup> |
| Zabinski, Wilfley, Calfas, Winzelberg, & Taylor (2004) [148]     | Dietary behavior    | 30  | 30  | 0.77 <sup>b</sup>  |

---

*Note.*  $g$  = standardized mean difference with Hedge's adjustment.  $N_E$  = number of participants in the experimental group,  $N_C$  = number of participants in the control group. <sup>a</sup>  $P < .05$ , <sup>b</sup>  $P < .01$ , <sup>c</sup>  $P < .001$ .
